# Supplementary material for: Identification of new TRIP12 variants and detailed clinical evaluation of individuals with non-syndromic intellectual disability with or without autism
Source: Springer Nature journal article supplement (doi:10.1007/s00439-016-1743-x), 2016-11-15
Supplement: MOESM1 [file 439_2016_1743_MOESM1_ESM.docx]

**Supplemental Table 1:** PCR and sequencing primers (individual 7). Primers for cDNA analyses of *TRIP12* splice mutations (individual 1 and 2).

| **Individual 7** | **der(2)** | **der(X)** |
| --- | --- | --- |
| **PCR - Forward** | AGCCCATTTACCTTAATATTAGATCCTCAC | TAATGTTCTCAACAATAGCACTGAGGTATC |
| **PCR - Reverse** | CTTAGTCCCCTTTTGAATGGACTATTTACT | TTACTCTTTAATTGACCATTATGTGCATGT |
| **Sequencing - Forward** | CATCTACTAATAAACATCATCTCCAAATGCT | ACACAACCTGCAATGTAGAAAGCACTATAT |
| **Sequencing - Reverse** | CCATTTGAAAATACCGGGGCTAGAATTTCT | AACTTCTCAGACCCCAGTGTTTCGTAATT |

|  | **Forward** | **Reverse** |
| --- | --- | --- |
| **Individual 1** | 5'-CAGCACAGCAGGGATGATTC-3' | 5'-GCTACGGATTTCTACAAGGCA-3' |
| **Individual 2** | 5'-TTGAAGAAGGGAAATGCACA-3' | 5'-GCTCCCACTACTATCTTCAGGTC-3' |
