# Supplementary material for: Identification of new TRIP12 variants and detailed clinical evaluation of individuals with non-syndromic intellectual disability with or without autism
Source: Springer Nature journal article supplement (doi:10.1007/s00439-016-1743-x), 2016-11-15
Supplement: MOESM2 [file 439_2016_1743_MOESM2_ESM.docx]

|  | **GRCh37/hg19** | **GRCh38/hg38** |
| --- | --- | --- |
| Indiv. 1 | chr2:g.230,663,590C>T | chr2:g.229,798,874C>T |
| Indiv. 2 | chr2:g.230,670,443dupT | chr2:g.229,805,727dupT |
| Indiv. 3 | chr2:g.230,701,654G>A | chr2:g.229,836,938G>A |
| Indiv. 4 | chr2:g.230,723,928_230,723,929delCT | chr2:g.229,859,212_229,859,213delCT |
| Indiv. 5 | chr2:g.230,652,322C>G | chr2:g.229,787,606C>G |
| Indiv. 6 | chr2:g.230,744,782G>A | chr2:g.229,880,066G>A |
| Indiv. 7 | chr2:g.230,778,893 | chr2:g.229,914,177 |
| Indiv. 8 | chr2:g.230,672,494G>A | chr2:g.229,807,778G>A |
| Indiv. 9 | chr2:g. 230,636,299G>A | chr2:g.229,771,583G>A |
| Indiv. 10 | chr2:g.230,650,558C>T | chr2:g.229,785,842C>T |
| Indiv. 11 | chr2:g.230,701,696G>A | chr2:g.229,836,980G>A |

**Supplemental Table 2**: Genomic coordinates of all *TRIP12* mutations.
